# Supplementary material
Source: Copernicus journal article supplement (doi:10.5194/egusphere-2024-4130)
Supplement: Supplementary file [file egusphere-2024-4130-AC4-supplement.pdf]

## Referee #2 comments

Spiller et al. present a simulation study designed to evaluate the ability of paired complex model-surrogate model to generate probabilistic postfire debris-flow runout hazard assessments both immediately after a fire and as recovery progresses. The manuscript is technically sound and the results are not over interpreted. The authors present an innovation that has the potential to substantially improve the process of postfire hazard assessment and I look forward to seeing the manuscript published in NHESS. My primary concerns are mostly suggestions for clarification or areas that I think more discussion is warranted.

### Primary concerns

- RC1. I suggest refining how the volume emulator introduced at L304 is described. As best as I can tell, the volume emulator takes either a subset or the full parameter vector (clarify) and produces only one value, the total eroded sediment (define  $s$  in L312). The volume emulator is then used as a filtering/screening step for the probabilistic analysis (described starting L313) to ensure consistency between the parameter sets and the Gartner et al. (2014) emergency assessment model.
- AC1. Thank you for this suggestion. We intend to add the following text at the bottom of the paragraph you're referencing here, "Rather than a map, the output from this GP, which we refer to as the volume emulator, is a single scalar value (e.g.,  $s = 1$ ) – the total volume of eroded sediment for a given debris flow simulation. Note that this volume emulator is trained on the same  $N = 64$  design simulations as the PPE inundation depth emulator and can likewise be evaluated at any untested combinations of parameters,  $\mathbf{q} = [k_s, r_{max}, \eta_0, F, \delta, RI_{fac}]$ . We then use this volume GP emulator in a screening step to identify parameter sets that are consistent with the Gartner et al. (2014) emergency assessment model."
- RC2. The process for generating probabilistic hazard assessments (starting L313) assumes that some subset of parameters is conditioned on the Gartner et al. (2014) emergency assessment model and some subset of parameters is sampled randomly (state whether uniform distribution or something else). This seems like a reasonable first pass at generating a probability distribution at each map pixel; however, I also think there are a number of limitations of interpreting the results as a probability. For example, it assumes you have a decent prior distribution of the randomly sampled inputs. I suggest discussing the implications of these limitations, and potential ways forward, in the discussion section. What would it take to not condition on matching the Gartner model and what implications would meeting that bar have for portability (see point 5).
- AC2. Thank you for this suggestion. We intend to briefly elaborate on our process in the paragraph at the end of Sec 3.5 and to add something along the lines of the following text to the discussion. "Emulators offer a significant advantage to probabilistic hazard analysis as compared to approaches that rely directly on debris flow simulations. If a GP is trained on a sufficiently broad design covering the support of any reasonable prior distribution, then the probabilistic modeling of aleatory (scenario) uncertainty can be developed *independently of the simulation set*. Here we looked at two approaches, one where we screened a uniformly sampled parameter space for parameter combinations that matched the Gartner model and a second that relied on parameters samples from a validation study of postfire recovery from the Liu et al (2021) work."
- RC3. The results of Section 4.2 make me wonder how few simulations you can get away with. It would likely depend on where (in map view) you are located. Consider discussion how you might determine the minimum number consider the spatial variability of the runout area.
- AC3. This suggestion is closely related to referee #1's RC3 and our response to it. Further, we agree that a discussion of future work to address design issues for PPE-based hazard analysis will be useful to the reader and we intend to expand on that in the discussion Sec 5.

- RC4. It is hard to interpret the results of the recovery experiment without seeing the curves of Liu et al. (2021). I think it would be worth reproducing those curves in this contribution, as well as stating the values for hydraulic roughness and saturated conductivity used for each panel in Figure 6. In the discussion you might also describe the potential to stretch curves based on satellite-based recovery metrics (Graber et al., 2023) or even use spatially distributed measures of vegetation recovery directly within the simulations.
- AC4. We intend to add a figure showing the curves. And thank you for the suggestion of adding a brief mention to the discussion that these types of curves could be further parameterized using satellite derived recovery metrics as has been done by others (e.g. Thomas et al., 2021) – we intend to do so.
- RC5. The text at L403 describes the spatial pattern of erosion. This is very cool, and an important point to make to motivate future improvement and to highlight that the correct runout results can be obtained even if the upland recruitment is not quite right. However, I suspect it would benefit from a figure illustrating the finding.
- AC5. A figure of spatial erosion patterns is in the supplemental materials, apologies that you did not have those at the time of your initial review. Further, we intend to add more to the main text to highlight this point.
- RC6. I would be interested in the authors thoughts on the implications of this result for the portability of the emulators and the need for site-specific calibration. I could imagine that on the basis of this work, the authors might articulate a set of behaviors any emulator-based approach would need to demonstrate in order to be portable. This list of candidate criteria could be highly useful for guiding future research.
- AC6. Thanks for this input. For good or ill, emulators inherit properties of the simulator. If a simulator needs site-specific calibration, an emulator will need something akin to site-specific calibration. That said, generally we want the emulator to be calibrated on a relatively wide range of plausible (even if unlikely) and physical realistic scenarios (in that their input rainfall timeseries + input parameters map to reasonably physical inundation patterns). Given this wide set of plausible inputs, we rely on probabilistic analysis to quantify the chances of a particular event and its likely impact. Nevertheless, there is likely some measures that can be transferred from one site to another, even if imperfectly. Although the precise features of one watershed are different from those of a different watershed, approximate characterizations of those regions – for example, soil type or fraction of vegetation cover – will provide an approximation of response to an intense rain event. The challenge is to better understand the measures that can be transferred and the approximate accuracy when transferring those concepts. Articulating strategies for easy transfer of emulators will be a suitable topic for future investigation.
- RC7. I am also interested in the authors sense of how sensitive the result are to the shape of the design storm. I do not think additional work is needed to elaborate on this point. However, different storm shapes are commonly discussed in operational work (e.g., USDA SCS 24-hour storms, alternating block method). Consider elaborating on this point in the discussion.
- AC7. We think this is a good avenue for future work and will elaborate on it in the discussion as an avenue for future work. This could be explored using an emulator if storms could be characterized by several criteria. Consider, for example, storms with a time series of rainfall that is shaped like a normal distribution and defined by a mean intensity and standard deviation.

### Figure comments

- RC1. Consider showing the location of KTYD on Figure 1.
- AC1. Thanks for this suggestion. The location of the KTYD gauge is approximately 5 km west of the watershed centroid, which makes it awkward to include in panel c and still focus the image on the

watershed and downstream deposits. We will state in the revised caption that “The KTYD gauge is located approximately 5 km west of the watershed centroid.”

RC2. I think the manuscript would benefit from a plot of the rainfall timeseries as well as the XX time series used to generate...

AC2. We apologize that the SI was not visible for review. The rainfall time series is shown in figure S1.

RC3. Figures S1, S2, and S3 are referenced but not present.

AC3. We apologize that the SI was not visible for review. The SI includes these three figures.

RC4. In Figure 3, I suggest adding a legend that labels the red circles as the left out points, and the blue/black as predicted. It took me a while to understand this figure because I was confused by the large range of the red values. It might be helpful to remind the reader in Section 4.2 that the training simulations are designed to generate a large range of flow depth values and a good test of emulator performance is the ability to confidently predict the left out value using the other values.

AC4. Thanks for this suggestion. We intend to add a legend to the figure and some more text in section 4.2 to explain the the leave-one-out experiments.

RC5. I cannot easily see the flow edges in the figures that use satellite base maps (Figures 5, 6, 7, 8). Suggest revising.

AC5. We will consider this suggestion.

RC6. Suggest stating the other parameter values used for each panel in Figure 2.

AC6. Thank you for the suggestion, we will add those values.

RC7. Suggest stating that no recovery is considered in the Figure 5 caption.

AC7 We plan on revising to “Probability of inundation for three rainfall scenarios assuming parameters associated with immediate postfire conditions...”

### **Suggested references**

In the time since this was submitted, Dunne et al. (2025) was published. As it complements Alessio et al. (2021) and Morell et al. (2021) work, consider incorporating it.

We agree that this is a relevant reference and will incorporate it into the revised discussion.

### **Line level comments**

L9: Elements before ‘grain size’ are missing.

Will change to “Simulation results are most sensitive to hydraulic roughness and grain size.”

L10: The contents of the sentence starting “Sensitivity analysis” seems to duplicate the content of the sentence starting on L9. Consider stating only once in the abstract.

Thank you for the suggestion, we plan to adjust that part of the abstract.

L16: Parentheses are missing around nearly all of the citations in the manuscript.

Thanks. We will make most citations parenthetical in the revision.

L31: Clarify what is meant by ‘sources’. Do you mean debris-flow volume? As you show later, that is itself parameterized by other inputs (e.g., rainfall).

Luke: I’m not sure what word is missing in front of ‘sources.’ Did we mean ‘data sources’? Or should we delete ‘sources’? I think the sentence still makes sense if we are referring only to model parameters.

ETS: I think maybe “volume sources”? Or, we could just delete “sources”.

L39: Consider saying that this is infiltration excess overland flow.

Thanks. Will change to ‘...spatially-distributed, infiltration-excess overland flow...’

L67: In this paragraph you might also point out that not relying on specification of a volume permits exploration of recovery.

This is a good point. We do mention this in the following paragraph so have opted not to include it in this paragraph (‘Since rainfall, runoff, and erosion processes are related to model parameters known to change following fire, such as saturated hydraulic conductivity, hydraulic roughness, and vegetation cover, this framework can be used to explore how postfire recovery affects debris-flow initiation, growth, and runoff.’).

L75: Although not strictly necessary, consider consistently quantifying what ‘computationally intensive’ means throughout. E.g., core-hour per fine grid cell?

Lukes thoughts: I’ll let one you decide what is the best metric for this but suggest we simply put something in parentheses such as ‘...computationally intensive (i.e., as quantified by core hours needed to run a simulation covering a small watershed)...’

L105: I suggest stating why San Ysidro and Oak creeks were selected over other runout paths in the region (Montecito Creek, Buena Vista Creek, Romero Creek).

These two watersheds were chosen over adjacent ones because they have been included in other modeling studies (e.g., Bessette-Kirton et al., 2019; Gibson et al., 2022), which allows for comparisons, and because observed debris flow volumes closely match those predicted by a commonly used empirical model that we employ as part of this study (Kean et al., 2019). We added this explanation to the end of the paragraph referenced here.

L125: Here and throughout, I suggest giving a name to McGuire et al. (2017) as implemented by Titan2D. E.g., Titan2D is not one model, but many and so in section 5.1 on model performance, it is a bit confusing discuss Titan2D performance. You could call it T2D-M2017 (or something better). Whatever you do, this is the section to introduce the terminology.

Thanks for this insight. We will use the suggested name (or something similar) in the revised manuscript.

L134: Define what is meant by ‘new material models’. I understand you are discussing different rheologies, or similar. However, I think most readers will benefit from a bit more explanation.

We intend to change the wording from ‘new material’ just called it ‘representations of the physics’ in the revision.

L135: Because this manuscript is not about the computational speedup, I suggest the text describing details of implementation are extraneous.

We agree that the details of TITAN features can be taken out. We intend to modified to two summary lines near L135 that highlight the added benefits of using the TITAN framework.

L141: Define U, F, and G.

We have added text to describe that U, F, and G denote the vector of conserved variables and their corresponding flux functions in the x- and y-direction, respectively.

L159: Define  $c$  as the sum of  $c_1, c_2, \dots, c_k$ .

Thanks for pointing out the need to clarify the sediment concentrations here. Volumetric sediment concentration is denoted by  $c$  whereas  $c_1, c_2, \dots, c_k$  denote sediment concentration for different particle size classes in units of  $\text{kg m}^{-3}$ .

L189: Cite the source of this DEM.

Data are publicly available through the USGS National Map. The source is 'U.S. Geological Survey, 2018, 3D Elevation Program 1-Meter Resolution Digital Elevation Model (published 20180527), last accessed December 19, 2025 at URL <https://www.usgs.gov/the-national-map-data-delivery>.'

L205: Given that debris flows in general, and this debris flow, in particular, had a wide range of grain sizes, I suggest adding some explanation as to the interpretation of  $d$ .

Thanks for the suggestion to provide some additional detail about interpretation of the representative particle size,  $\delta$ . The representative particle size plays an important role in determining the balance of entrainment and deposition in runoff through its influence on the particle settling velocity. We interpret  $\delta$  as a parameter that effectively modulates the rate and style of sediment transport by influencing settling velocity. The model, for example, does not treat bed load and suspended load fluxes separately but the balance of entrainment and deposition fluxes, the later of which is strongly influenced by  $\delta$ , influence how frequently particles are in contact with the bed as they are transported. For these reasons, we do not attempt to link the value of  $\delta$  to any particular metric (e.g.,  $d_{50}$ ) related to the grain size distribution.

L201: State the AMR refinement criteria, levels, and any other specifications used.

The number of AMR levels is defined in the code and in most computations we have restricted it to 2 levels. A simple absolute magnitudes of fluxes have been used as the refinement criteria. More formal error estimators are expensive and in this class of problems do not provide much advantage in our experience.

L237: –  $W$  has another usage (introduced at L179). I suggest using a different symbol.  $g$  is also used (with subscripts) in equations (5), (6), and (7). Disambiguate the symbology. This equation also differs from that introduced by Heiser et al. (2017) in that  $\beta$  and  $\gamma$  should be subtracted from  $\alpha$ . I find it useful to point out that this misfit metric is commonly called other things after undergoing linear transformation (trimline ratio, threat score, critical success index).

Thanks for pointing this out. We will be careful to disambiguate notation in the revised submission.

L258: Here and elsewhere: I found inconsistent use of tense. The run inputs were chosen. I suggest revising to consistently describe work done in the past in the past tense.

Thank you for pointing this out. We will revise the resubmission to consistently use past tense for work done.

L271: Earlier, the subscript  $k$  was for size classes. Consider using unique symbology for size classes and input parameters.

Thanks for this suggestion, we will update the symbols in the revision.

L270: 'Range parameter' may be the standard name for  $\Theta$ . However, because all the other parameters are inputs and the range parameter is a measure of sensitivity, I got confused. If it is not a standard name, consider using a more descriptive name. If it is a standard name, consider introducing it in a bit more detail (e.g., it appears like a variance such that low variance parameters are more important).

Thanks for pointing this out. 'Range parameter' is a standard term. We will add some text in Sec 3.4 to provide more detail.

L274: Here is a place where a consistent definition of computational efficiency would benefit. It would permit direct comparison between the complex model and the surrogate at a prediction pixel level.

Thanks for this suggestion. We will add a per pixel computational comparison at this part of the text.

L289: The text in this paragraph does not seem like a numerical experiment to me. Rather, it is the analysis of the emulator fit.

Thanks. We will update the title of Section 3.5 to ‘Emulator analyses’. Section 3.5 is meant to be a summary of various emulator studies whose results are presented in Section 4.

L293: State whether the emulator here is fit with  $N=64$  or is something else.

Thanks. Will do so.

L316: This 10% range is larger than the uncertainty in the Gartner et al. (2014) emergency assessment model. Consider explaining in more detail why 10% was chosen and what it means in light of the larger uncertainty on that model.

In general, there is a roughly an order-of-magnitude of uncertainty associated with volume estimates predicted by then Gartner et al. (2014) model. We used a range of 10% around the Gartner et al. (2014) model prediction since that model performed well at predicting debris flow volume in the two watersheds that we modeled (Kean et al., 2019). The observed volume was  $307000\text{ m}^3$  compared with a modeled volume of  $320000\text{ m}^3$ . We have added a sentence to clarify our thinking for the range of 10% given the greater uncertainty with the model in more general circumstances.

Fig 4 caption:  $I_{15}$  subscript formatting issue.

Thanks, will be corrected in the revision.

L433: ‘with increasing delta’.

Thanks, will change to “decreases with increasing  $\delta$ .”

L477: What would be required for a pre-fire emulator?

A pre-fire emulator would also require selecting a range of potential values (or a distribution) for model parameters. Nearby calibration sites, if they exist, would be beneficial for refining these parameter distributions.

L505: Consider providing an example driver file.

We will consider doing so.
